# Supplementary material
Source: PubMed Central journal article supplement (PMC7465484)
Supplement: NIHMS1622963-supplement-1.pdf [file NIHMS1622963-supplement-1.pdf]

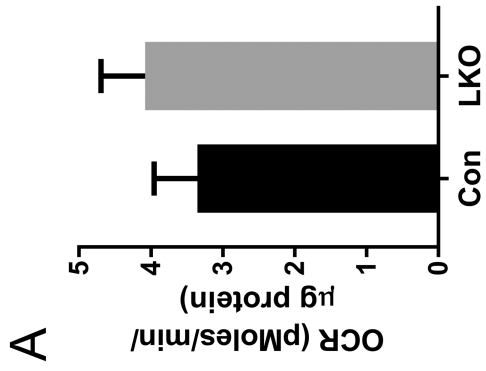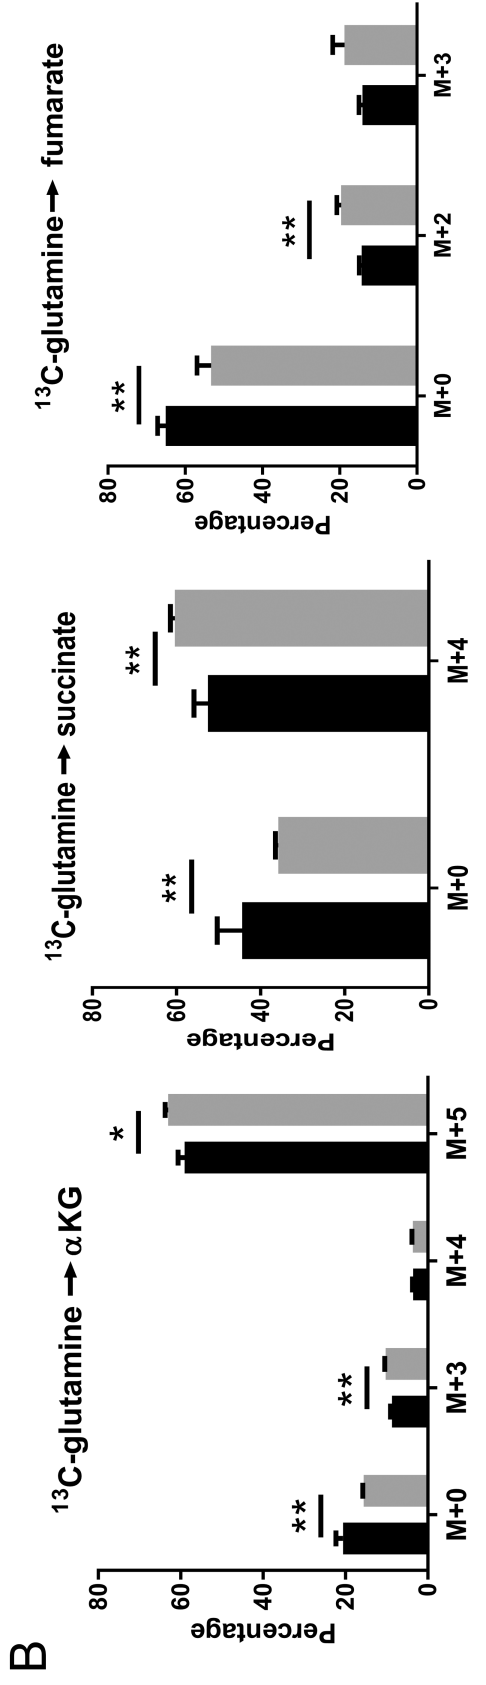

Supplementary Figure 1

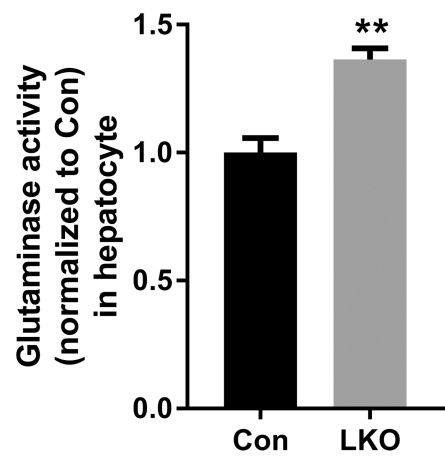

**Supplementary Figure 2**

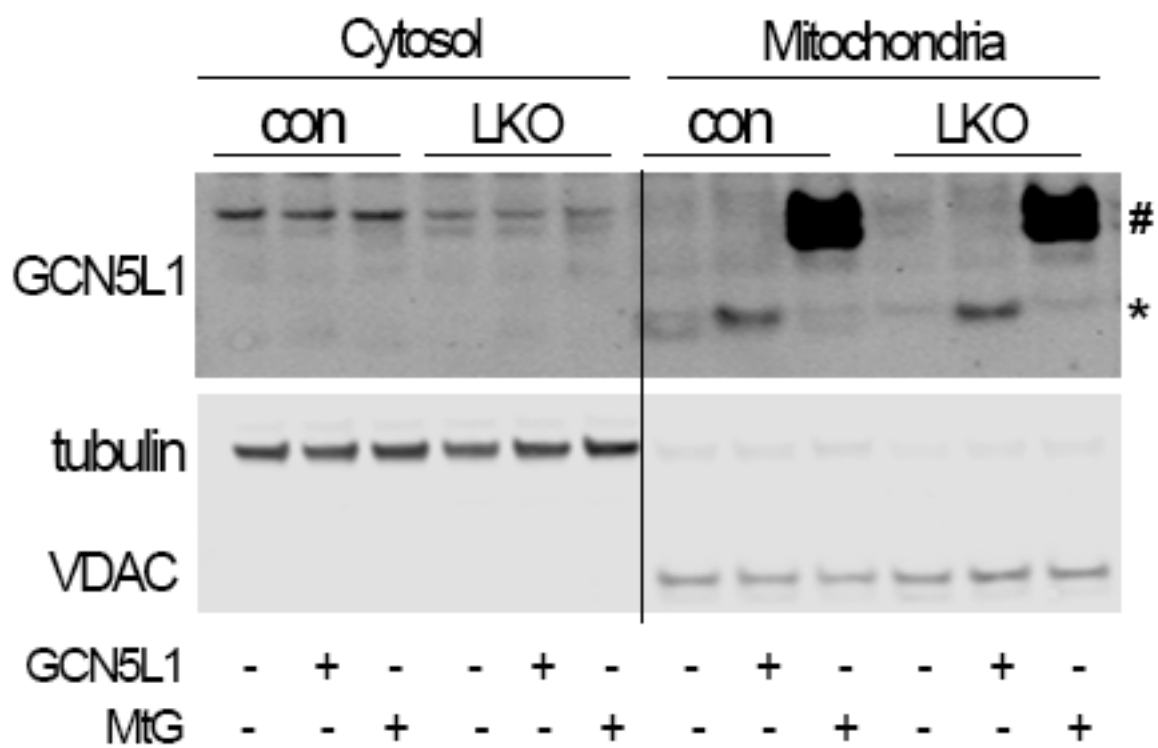

Supplementary Figure 3

**A**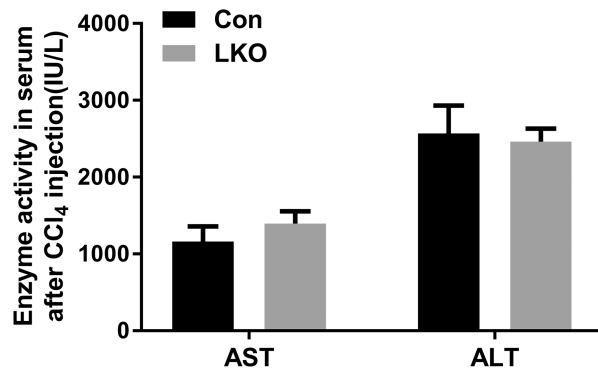**B**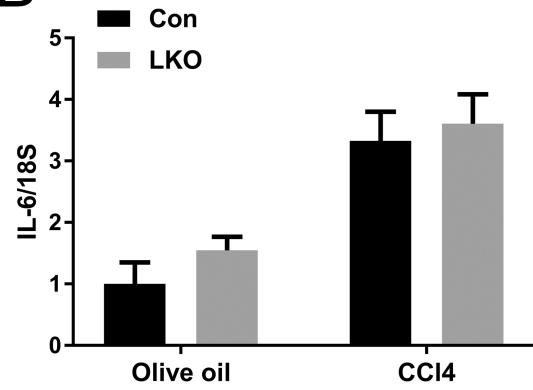**Supplementary Figure 4**

olive oil

CCl<sub>4</sub>

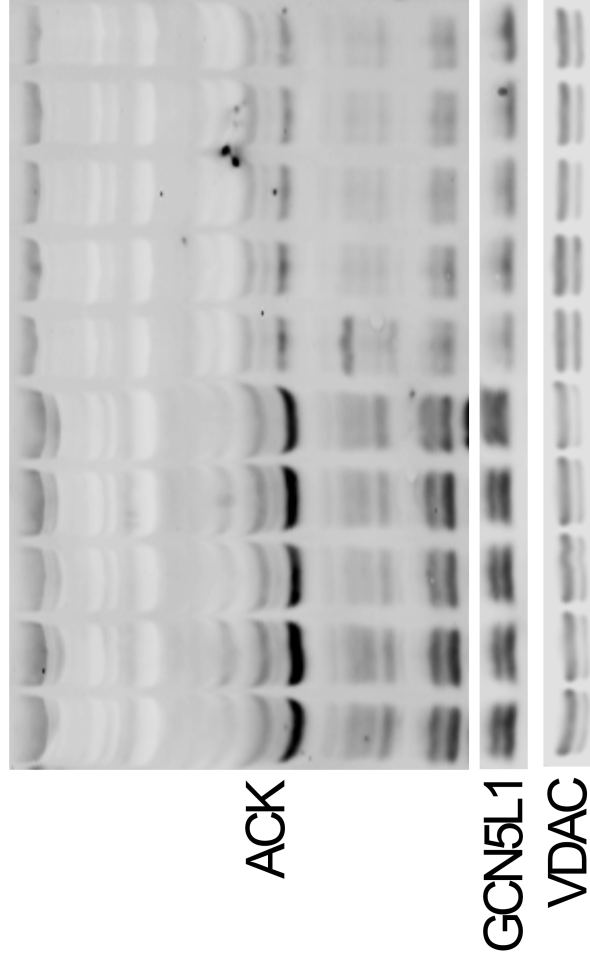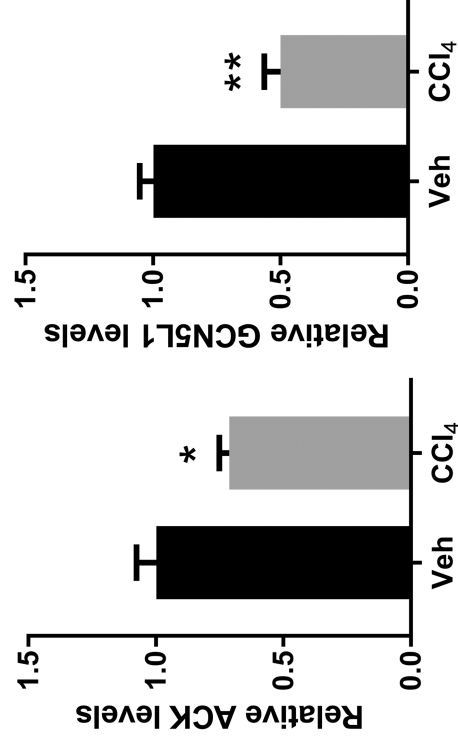

Supplementary Figure 5
